# Supplementary material for: Suprachoroidal and Subretinal Injections of AAV Using Transscleral Microneedles for Retinal Gene Delivery in Nonhuman Primates
Source: PubMed Central journal article supplement — Mol Ther Methods Clin Dev. 2020 Jan 21;16:179–91. doi: 10.1016/j.omtm.2020.01.002 (PMC7005511; doi:10.1016/j.omtm.2020.01.002), 2020-01-21
Supplement: mmc1.pdf [file mmc1.pdf]

**OMTM, Volume 16**

**Supplemental Information**

**Suprachoroidal and Subretinal Injections  
of AAV Using Transscleral Microneedles for  
Retinal Gene Delivery in Nonhuman Primates**

**Glenn Yiu, Sook Hyun Chung, Iris N. Mollhoff, Uyen Tu Nguyen, Sara M. Thomasy, Jesse Yoo, Donna Taraborelli, and Glenn Noronha**

## Supplementary Materials

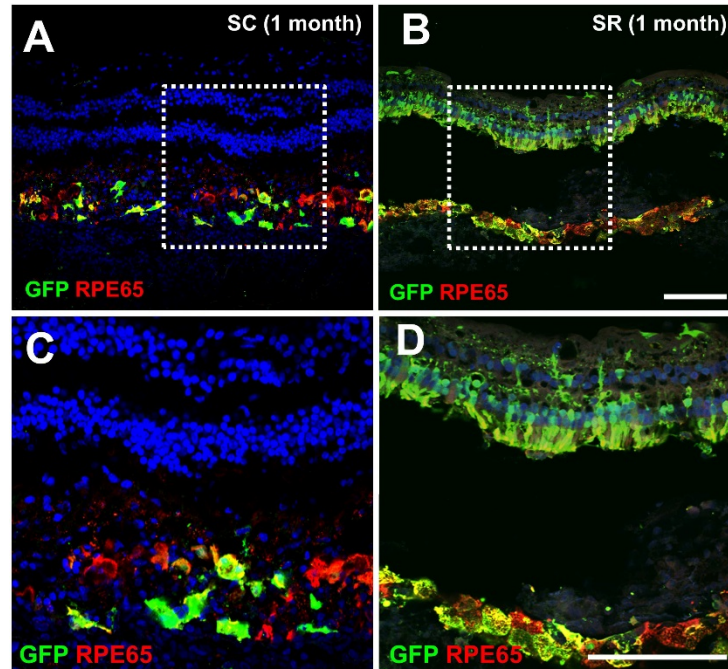

**Fig S1.** Retinal anatomy and GFP expression near injection sites after suprachoroidal and subretinal injection of AAV8 in rhesus macaques. **(A-B)** Confocal fluorescence images with **(C-D)** magnified views of the white-dashed boxes in **(A-B)** showing GFP expression (green) co-immunostained with anti-RPE65 (red) to label retinal pigment epithelium (RPE) in areas of retinal structure disruption near injection sites after suprachoroidal (**A, C**) or subretinal (**B, D**) injections of AAV8. Scale bars: 100 μm.

**A**

| ID        | Eye | Dose (vg/eye)        | Injectant Location | Pre-injection AC Cell | 1 Week AC Cell | 2 Week AC Cell | 1 Month AC Cell | 2 Months AC Cell | 3 Months AC Cell |
|-----------|-----|----------------------|--------------------|-----------------------|----------------|----------------|-----------------|------------------|------------------|
| Rhesus 01 | OD  | 7 x 10 <sup>11</sup> | SC                 | 0                     | 0.5            | 0              | 0               |                  | 0                |
|           | OS  | 7 x 10 <sup>11</sup> | SC                 | 0                     | 0              | 0              | 0               |                  | 0                |
| Rhesus 02 | OD  | 7 x 10 <sup>12</sup> | SC                 | 0                     | 0.5            | 2*             | 0               |                  | 0                |
|           | OS  | 7 x 10 <sup>12</sup> | SC                 | 0                     | 0.5            | 2*             | 0               |                  | 0                |
| Rhesus 03 | OD  | 7 x 10 <sup>12</sup> | SR                 | 0 <sup>#</sup>        | 0              | 0              | 0               | 0                |                  |
|           | OS  | 7 x 10 <sup>12</sup> | SC                 | 0 <sup>#</sup>        | 0              | 0              | 0               | 0                |                  |
| Rhesus 04 | OD  | 7 x 10 <sup>12</sup> | SR                 | 0 <sup>#</sup>        | 0              | 0              | 0               |                  |                  |
|           | OS  | 7 x 10 <sup>12</sup> | SC                 | 0 <sup>#</sup>        | 0              | 0              | 0               |                  |                  |
| Rhesus 05 | OD  | 7 x 10 <sup>12</sup> | IVT                | 0 <sup>#</sup>        | 0              | 0              | 0               |                  |                  |
|           | OS  | 7 x 10 <sup>12</sup> | IVT                | 0 <sup>#</sup>        | 0              | 0              | 0               |                  |                  |

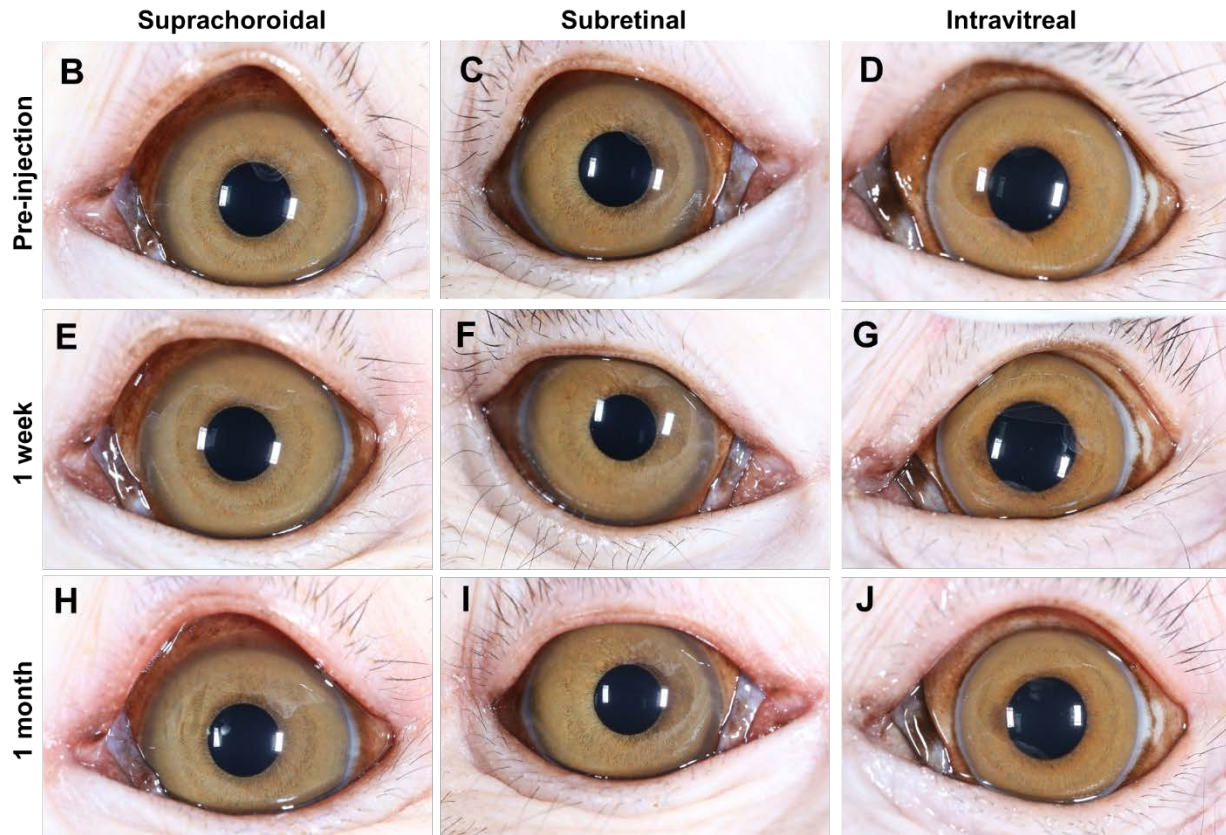

**Fig S2.** Anterior chamber inflammation following suprachoroidal, subretinal, and intravitreal injections of AAV8. (A) Table outlining study animals and eyes, AAV8 dose, injectant location, and degree of anterior chamber (AC) cell before and after intraocular injections. AC cells were graded based on Standardization of Uveitis Nomenclature (SUN) criteria. \*Rhesus 02 exhibited AC inflammation at 2 weeks and was treated oral prednisone (1mg/kg), while <sup>#</sup>subsequent animals received periorbital subtenon triamcinolone acetate (40mg) at time of the AAV8 injection. (B-J) Representative external photographs show minimal anterior uveitis before (B-D), and at 1 week (E-G) or 1 month (H-J) after suprachoroidal (B, E, H), subretinal (C, F, I) or intravitreal (D, G, J) injections of AAV8.

**A**

| ID        | Eye | Dose (vg/eye)        | Injectant Location | Pre-injection Vitreous Haze | 1 Week Vitreous Haze | 2 Week Vitreous Haze | 1 Month Vitreous Haze | 2 Months Vitreous Haze | 3 Months Vitreous Haze |
|-----------|-----|----------------------|--------------------|-----------------------------|----------------------|----------------------|-----------------------|------------------------|------------------------|
| Rhesus 01 | OD  | 7 x 10 <sup>11</sup> | SC                 | 0                           | 0                    | 0                    | 0                     |                        | 0                      |
|           | OS  | 7 x 10 <sup>11</sup> | SC                 | 0                           | 0                    | 0                    | 0                     |                        | 0                      |
| Rhesus 02 | OD  | 7 x 10 <sup>12</sup> | SC                 | 0                           | 0                    | 0                    | 0                     |                        | 0                      |
|           | OS  | 7 x 10 <sup>12</sup> | SC                 | 0                           | 0                    | 0                    | 0                     |                        | 0                      |
| Rhesus 03 | OD  | 7 x 10 <sup>12</sup> | SR                 | 0                           | 0                    | 0                    | 0                     | 0                      |                        |
|           | OS  | 7 x 10 <sup>12</sup> | SC                 | 0                           | 0                    | 0                    | 0                     | 0                      |                        |
| Rhesus 04 | OD  | 7 x 10 <sup>12</sup> | SR                 | 0                           | 0                    | 0                    | 0                     | 0                      |                        |
|           | OS  | 7 x 10 <sup>12</sup> | SC                 | 0                           | 0                    | 0                    | 0                     |                        |                        |
| Rhesus 05 | OD  | 7 x 10 <sup>12</sup> | IVT                | 0                           | 0                    | 0                    | 0                     |                        |                        |
|           | OS  | 7 x 10 <sup>12</sup> | IVT                | 0                           | 0                    | 0                    | 0                     |                        |                        |

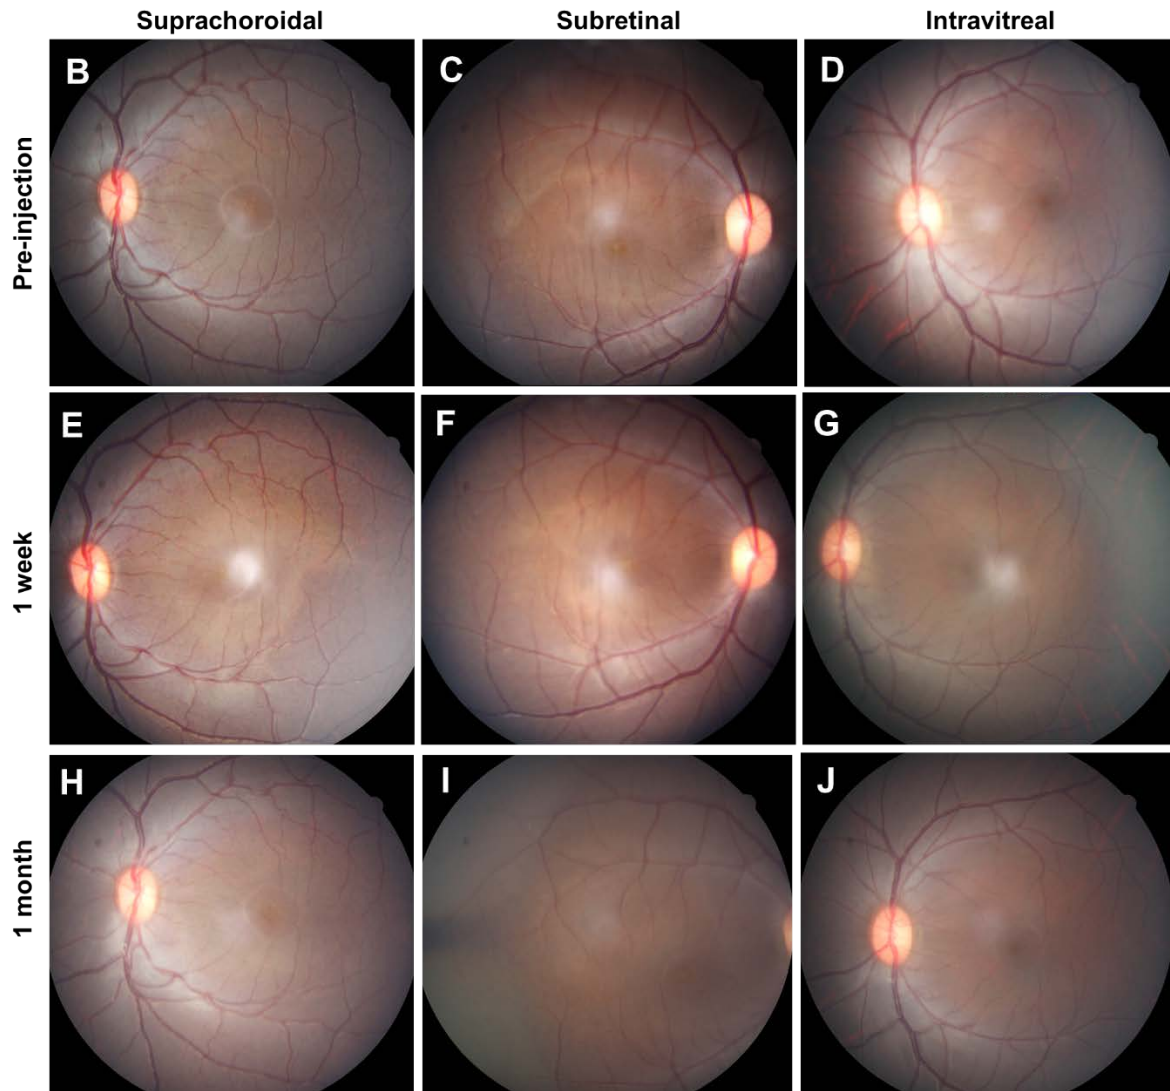

**Fig S3.** Posterior inflammation following suprachoroidal, subretinal, and intravitreal injections of AAV8. **(A)** Table outlining study animals and eyes, AAV8 dose, injectant location, and vitreous haze before and after intraocular injections. Vitreous inflammation was graded based on National Eye Institute (NEI) scale for vitreous haze. **(B-J)** Representative fundus photographs show minimal vitritis before (B-D), and at 1 week (E-G) or 1 month (H-J) after suprachoroidal (B, E, H), subretinal (C, F, I) or intravitreal (D, G, J) injections of AAV8.

**Table S1.** Intraocular pressure after suprachoroidal, subretinal, or intravitreal AAV8 injections

| <b>ID</b>        | <b>Eye</b> | <b>Dose</b><br>(vg/eye) | <b>Injectant</b><br><b>Location</b> | <b>Pre-</b><br><b>injection</b><br><b>IOP</b> | <b>1</b><br><b>Week</b><br><b>IOP</b> | <b>1</b><br><b>Month</b><br><b>IOP</b> | <b>2</b><br><b>Months</b><br><b>IOP</b> | <b>3</b><br><b>Months</b><br><b>IOP</b> |
|------------------|------------|-------------------------|-------------------------------------|-----------------------------------------------|---------------------------------------|----------------------------------------|-----------------------------------------|-----------------------------------------|
| <b>Rhesus 01</b> | OD         | $7 \times 10^{11}$      | SC                                  | 14                                            | 7                                     | 7                                      |                                         | 14                                      |
|                  | OS         | $7 \times 10^{11}$      | SC                                  | 19                                            | 10                                    | 8                                      |                                         | 20                                      |
| <b>Rhesus 02</b> | OD         | $7 \times 10^{12}$      | SC                                  | 17                                            | 13                                    | 23                                     |                                         | 13                                      |
|                  | OS         | $7 \times 10^{12}$      | SC                                  | 18                                            | 18                                    | 23                                     |                                         | 15                                      |
| <b>Rhesus 03</b> | OD         | $7 \times 10^{12}$      | SR                                  | 19                                            | 16                                    | 16                                     | 21                                      |                                         |
|                  | OS         | $7 \times 10^{12}$      | SC                                  | 24                                            | 19                                    | 19                                     | 19                                      |                                         |
| <b>Rhesus 04</b> | OD         | $7 \times 10^{12}$      | SR                                  | 14                                            | 13                                    | 18                                     |                                         |                                         |
|                  | OS         | $7 \times 10^{12}$      | SC                                  | 17                                            | 15                                    | 16                                     |                                         |                                         |
| <b>Rhesus 05</b> | OD         | $7 \times 10^{12}$      | IVT                                 | 21                                            | 15                                    | 15                                     |                                         |                                         |
|                  | OS         | $7 \times 10^{12}$      | IVT                                 | 19                                            | 14                                    | 14                                     |                                         |                                         |
